# Supplementary material
Source: PubMed Central journal article supplement (PMC2522244)
Supplement: pmed.0050166.sd003.pdf [file pmed.0050166.sd003.pdf]

**QUOROM Statement checklist: GREATER RESPONSE TO PLACEBO IN CHILDREN THAN IN ADULTS : A SYSTEMATIC REVIEW AND META-ANALYSIS IN DRUG-RESISTANT PARTIAL EPILEPSY**

| Heading             | Subheading                  | Descriptor                                                                                                                                                                                                                                                                                                                | Reported? (Y/N) | Heading: Subheading                                                          |
|---------------------|-----------------------------|---------------------------------------------------------------------------------------------------------------------------------------------------------------------------------------------------------------------------------------------------------------------------------------------------------------------------|-----------------|------------------------------------------------------------------------------|
| <b>Title</b>        |                             | Identify the report as a systematic review                                                                                                                                                                                                                                                                                | Y               | Title                                                                        |
| <b>Abstract</b>     |                             | Use a structured format                                                                                                                                                                                                                                                                                                   | Y               | Abstract                                                                     |
|                     | Objectives                  | The clinical question explicitly                                                                                                                                                                                                                                                                                          | Y               | Abstract: Background                                                         |
|                     | Data sources                | The databases (ie, list) and other information sources                                                                                                                                                                                                                                                                    | Y               | Abstract: Methods and Findings                                               |
|                     | Review methods              | The selection criteria (ie, population, intervention, outcome, and study design); methods for validity assessment, data abstraction, and study characteristics, and quantitative data synthesis in sufficient detail to permit replication                                                                                | Y               | Abstract: Methods and Findings                                               |
|                     | Results                     | Characteristics of the RCTs included and excluded; qualitative and quantitative findings (ie, point estimates and confidence intervals); and subgroup analyses                                                                                                                                                            | Y               | Abstract: Methods and Findings                                               |
|                     | Conclusion                  | The main results                                                                                                                                                                                                                                                                                                          | Y               | Abstract: Methods and Findings and Conclusion                                |
| <b>Describe</b>     |                             |                                                                                                                                                                                                                                                                                                                           |                 |                                                                              |
| <b>Introduction</b> |                             | The explicit clinical problem, biological rationale for the intervention, and rationale for review                                                                                                                                                                                                                        | Y               | Introduction                                                                 |
| <b>Methods</b>      | Searching                   | The information sources, in detail (eg, databases, registers, personal files, expert informants, agencies, hand-searching), and any restrictions (years considered, publication status, language of publication)                                                                                                          | Y               | Materials and Methods: Literature search and supplementary data              |
|                     | Selection                   | The inclusion and exclusion criteria (defining population, intervention, principal outcomes, and study design)                                                                                                                                                                                                            | Y               | Materials and Methods: Study Selection, Outcome Measures                     |
|                     | Validity assessment         | The criteria and process used (eg, masked conditions, quality assessment, and their findings)                                                                                                                                                                                                                             | Y               | Materials and Methods: Study selection                                       |
|                     | Data abstraction            | The process or processes used (eg, completed independently, in duplicate)                                                                                                                                                                                                                                                 | Y               | Materials and Methods: Data abstraction                                      |
|                     | Study characteristics       | The type of study design, participants' characteristics, details of intervention, outcome definitions, and how clinical heterogeneity was assessed                                                                                                                                                                        | Y               | Materials and Methods: Study selection, statistical methods                  |
|                     | Quantitative data synthesis | The principal measures of effect (eg, relative risk), method of combining results (statistical testing and confidence intervals), handling of missing data; how statistical heterogeneity was assessed; a rationale for any a-priori sensitivity and subgroup analyses; and any assessment of publication bias            | Y               | Materials and Methods: Statistical Methods                                   |
| <b>Results</b>      | Trial flow                  | Provide a meta-analysis profile summarising trial flow (see figure)                                                                                                                                                                                                                                                       | Y               | Results: Study Selection; Figure 1                                           |
|                     | Study characteristics       | Present descriptive data for each trial (eg, age, sample size, intervention, dose, duration, follow-up period)                                                                                                                                                                                                            | Y               | Results: Table 1 and 2; supplementary data.                                  |
|                     | Quantative data synthesis   | Report agreement on the selection and validity assessment; present simple summary results (for each treatment group in each trial, for each primary outcome); present data needed to calculate effect sizes and confidence intervals in intention-to-treat analyses (eg 2X2 tables of counts, means and SDs, proportions) | Y               | Results: Quantitative data synthesis; figures 2,3,4,5; Supplemental figure 1 |
| <b>Discussion</b>   |                             | Summarise key findings; discuss clinical inferences based on internal and external validity; interpret the results in light of the totality of available evidence; describe potential biases in the review process (eg, publication bias); and suggest a future research agenda                                           | Y               | Discussion                                                                   |
