# Supplementary material
Source: PubMed Central journal article supplement (PMC2522244)

A. 50% Responder rate at comparable doses

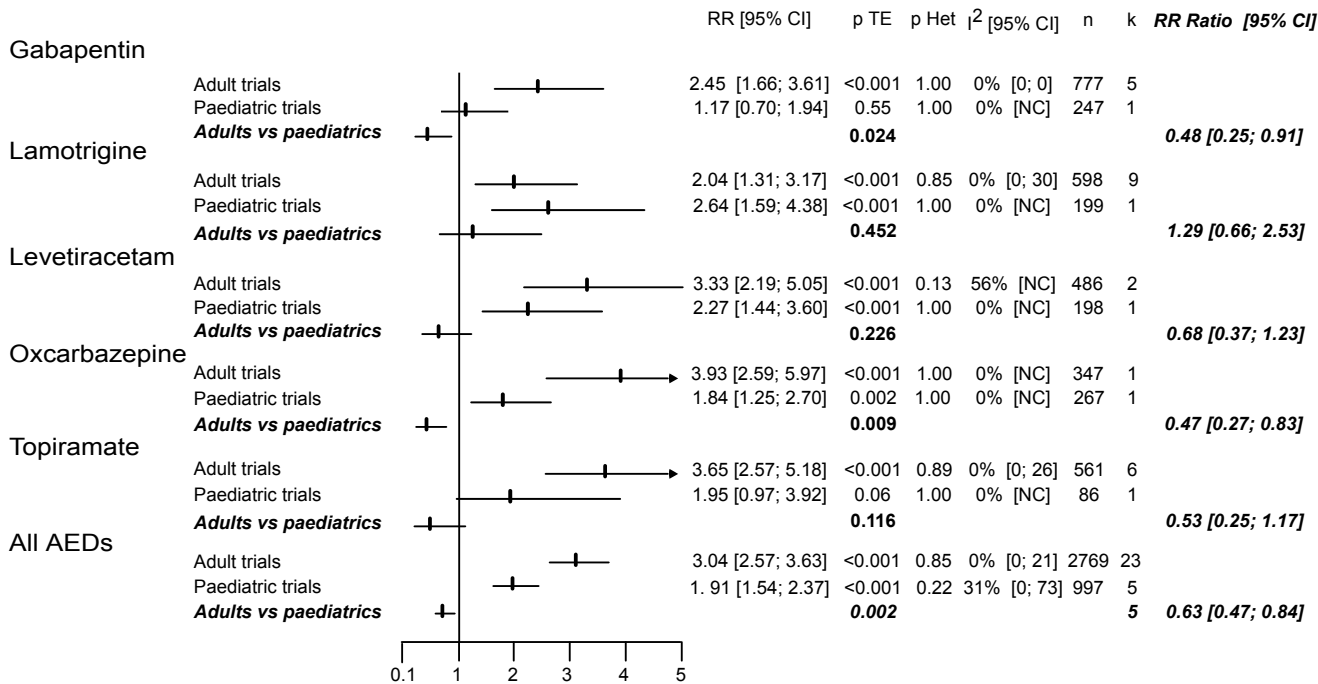

B.

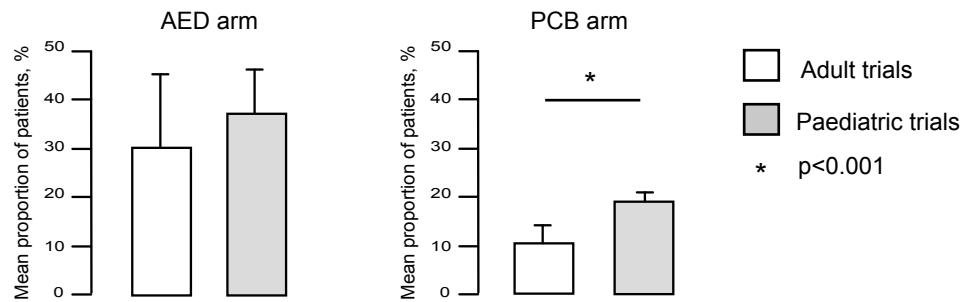

Supplement: pmed.0050166.sg001.pdf [file pmed.0050166.sg001.pdf]
